# Supplementary material
Source: MDPI journal article supplement (https://www.mdpi.com/2071-1050/13/15/8181)
Supplement: s1 [file s1]

Country: .....

### 1. Data collection

Do you already collect data on the following themes for national purposes at farm level:

| Theme                                | Yes                      | No                       |
|--------------------------------------|--------------------------|--------------------------|
| Use of Advisory service              | <input type="checkbox"/> | <input type="checkbox"/> |
| Education and training               | <input type="checkbox"/> | <input type="checkbox"/> |
| Ownership of farm                    | <input type="checkbox"/> | <input type="checkbox"/> |
| Involvement in farming organisations | <input type="checkbox"/> | <input type="checkbox"/> |
| Engagement in local community        | <input type="checkbox"/> | <input type="checkbox"/> |
| Working conditions                   | <input type="checkbox"/> | <input type="checkbox"/> |
| Quality of life                      | <input type="checkbox"/> | <input type="checkbox"/> |
| Farm succession                      | <input type="checkbox"/> | <input type="checkbox"/> |
| Innovation                           | <input type="checkbox"/> | <input type="checkbox"/> |
| Age of assets                        | <input type="checkbox"/> | <input type="checkbox"/> |
| Producing under (quality) labels     | <input type="checkbox"/> | <input type="checkbox"/> |
| Sales channels (coops, consumers..)  | <input type="checkbox"/> | <input type="checkbox"/> |
| Greening                             | <input type="checkbox"/> | <input type="checkbox"/> |
| Semi-natural areas                   | <input type="checkbox"/> | <input type="checkbox"/> |
| Soil organic matter                  | <input type="checkbox"/> | <input type="checkbox"/> |
| Nitrate leaching management          | <input type="checkbox"/> | <input type="checkbox"/> |
| Soil erosion management              | <input type="checkbox"/> | <input type="checkbox"/> |
| Use of legumes                       | <input type="checkbox"/> | <input type="checkbox"/> |
| Location and distances to parcels    | <input type="checkbox"/> | <input type="checkbox"/> |
| Insurances                           | <input type="checkbox"/> | <input type="checkbox"/> |
| Use of contracts                     | <input type="checkbox"/> | <input type="checkbox"/> |
| Risk management practises            | <input type="checkbox"/> | <input type="checkbox"/> |
| Pesticide usage (quantities)         | <input type="checkbox"/> | <input type="checkbox"/> |
| Greenhouse gas emissions             | <input type="checkbox"/> | <input type="checkbox"/> |
| Nutrient balance (quantities)        | <input type="checkbox"/> | <input type="checkbox"/> |
| Direct energy use (quantities)       | <input type="checkbox"/> | <input type="checkbox"/> |
| Renewable energy production          | <input type="checkbox"/> | <input type="checkbox"/> |
| Water usage (quantities)             | <input type="checkbox"/> | <input type="checkbox"/> |
| Irrigation practices                 | <input type="checkbox"/> | <input type="checkbox"/> |

### 2. IT for fadn system

Please answer the following questions about your IT system and IT organisation

|                                                                                       |                                                             |
|---------------------------------------------------------------------------------------|-------------------------------------------------------------|
| Do you have a country specific IT system for FADN                                     | <input type="checkbox"/> Yes<br><input type="checkbox"/> No |
| Do you have your own IT personnel to make changes to the FADN software                | <input type="checkbox"/> Yes<br><input type="checkbox"/> No |
| Do you think international cooperation in developing FADN software would be useful    | <input type="checkbox"/> Yes<br><input type="checkbox"/> No |
| Do you integrate data from other sources (such as administrative data) in your system | <input type="checkbox"/> Yes<br><input type="checkbox"/> No |

### 3. Organisational structure

Please select the organisations that reflects your situation the best

|                                            |                                                                                                                                                                                       |
|--------------------------------------------|---------------------------------------------------------------------------------------------------------------------------------------------------------------------------------------|
| Who is the liaison agency in your country  | <input type="checkbox"/> Ministry<br><input type="checkbox"/> Research institute<br><input type="checkbox"/> Statistical office<br><input type="checkbox"/> Other, .....              |
| Who collects the FADN data in your country | <input type="checkbox"/> Accounting offices<br><input type="checkbox"/> Advisory service<br><input type="checkbox"/> Staff of liaison agency<br><input type="checkbox"/> Other, ..... |

### 4. Current resources for FADN data collection

Please give an indication of the resources for collecting data on one individual farm

|                                                                                                 |                         |
|-------------------------------------------------------------------------------------------------|-------------------------|
| Number of hours for collecting data on one farm (including preparation, farm visit, data entry) | .....<br>hours per farm |
| Required budget for collecting data on one farm (including preparation, farm visit, data entry) | .....<br>euro per farm  |

### 5. Required resources for FLINT data collection

Please give a rough estimate of how many hours per farm it would cost to collect the FLINT data in your country (including preparation, farm visit, data entry).

|                                             |                        |
|---------------------------------------------|------------------------|
| Hours to collect FLINT data in your country | .....hours<br>per farm |
|---------------------------------------------|------------------------|

Flint has used a few typical examples of data collection:

1. Netherlands/Ireland: already much data available, FLINT data gathered in same process as FADN.
2. Poland/Hungary: not much data available, FLINT data gathered in same process as FADN.
3. France/Greece: not much data available, FLINT data gathered in a separate farm visit.

|                                                            |                                                                                                                                   |
|------------------------------------------------------------|-----------------------------------------------------------------------------------------------------------------------------------|
| Which of the three examples most resembles your situation? | <input type="checkbox"/> 1, Ireland/NL<br><input type="checkbox"/> 2, Poland/Hungary<br><input type="checkbox"/> 3, France/Greece |
|------------------------------------------------------------|-----------------------------------------------------------------------------------------------------------------------------------|
